# Supplementary material
Source: MDPI journal article supplement (https://www.mdpi.com/2673-995X/4/1/1)
Supplement: s1 [file s1]

Archive with 2 entries (2 files):
- Table S1 Full Search Terms.pdf
- Table S2 Initial Programme Theory Development and CMO Brainstorm.pdf
